# Supplementary material for: Efficient approach for preparing gold nanoparticles in layered double hydroxide: synthesis, structure, and properties
Source: Royal Society of Chemistry journal article supplement (doi:10.1039/c2jm31993d), 2012-01-01
Supplement: c2jm31993d.pdf [file c2jm31993d.pdf]

## Supporting Information

For

Efficient Approach for Preparing Gold Nanoparticles in Layered  
Double Hydroxide: Synthesis, Structure, and Properties

Dharmesh Varade, Kazutoshi Haraguchi\*

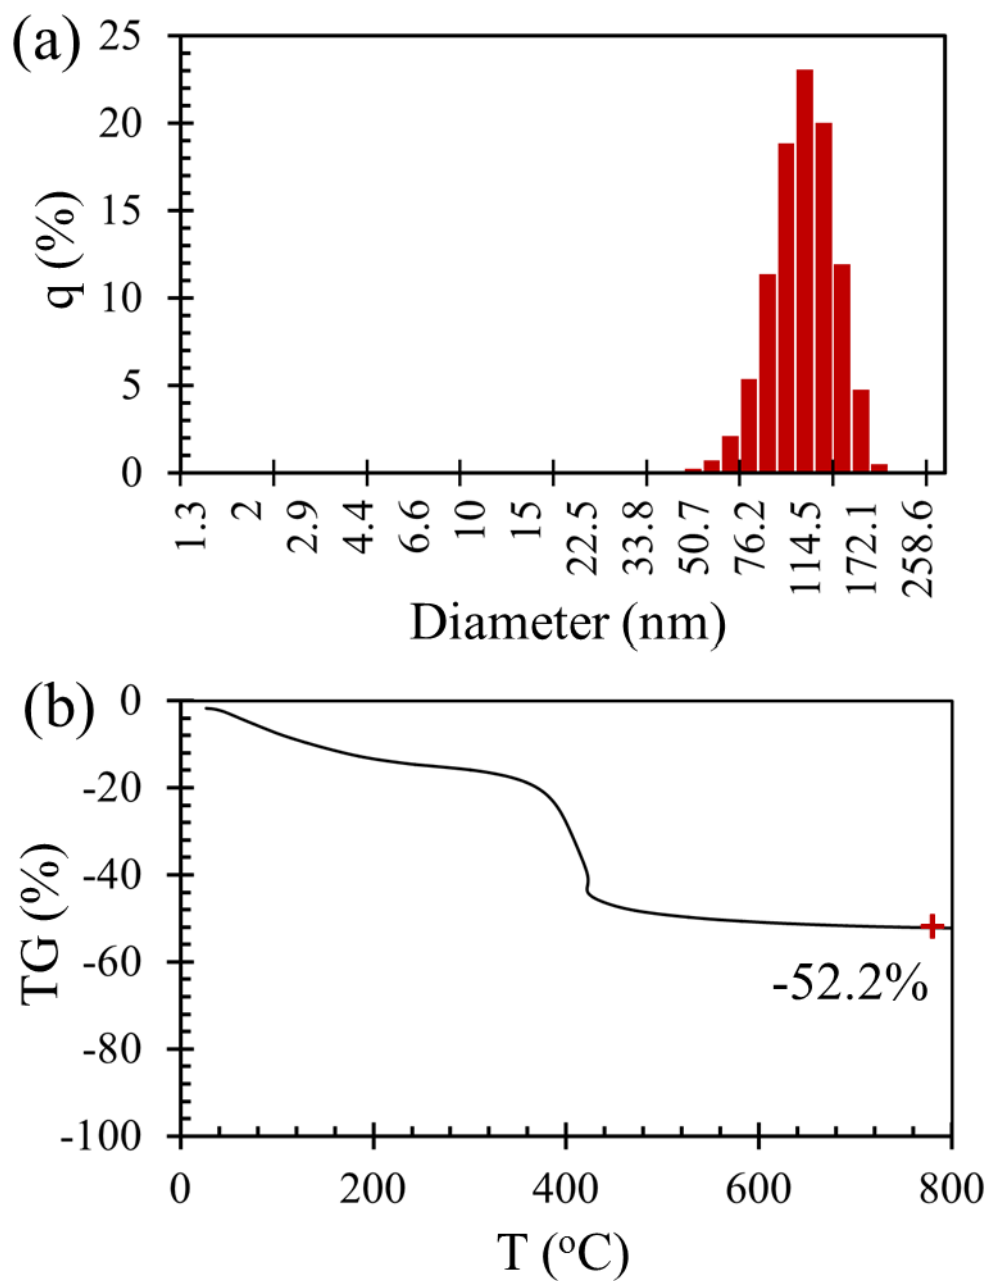

**Figure S1:** (a) Dynamic light scattering (DLS) measurements depicting the particle distribution for LDH dispersion in water, (b) TGA measurements for LDH sample.

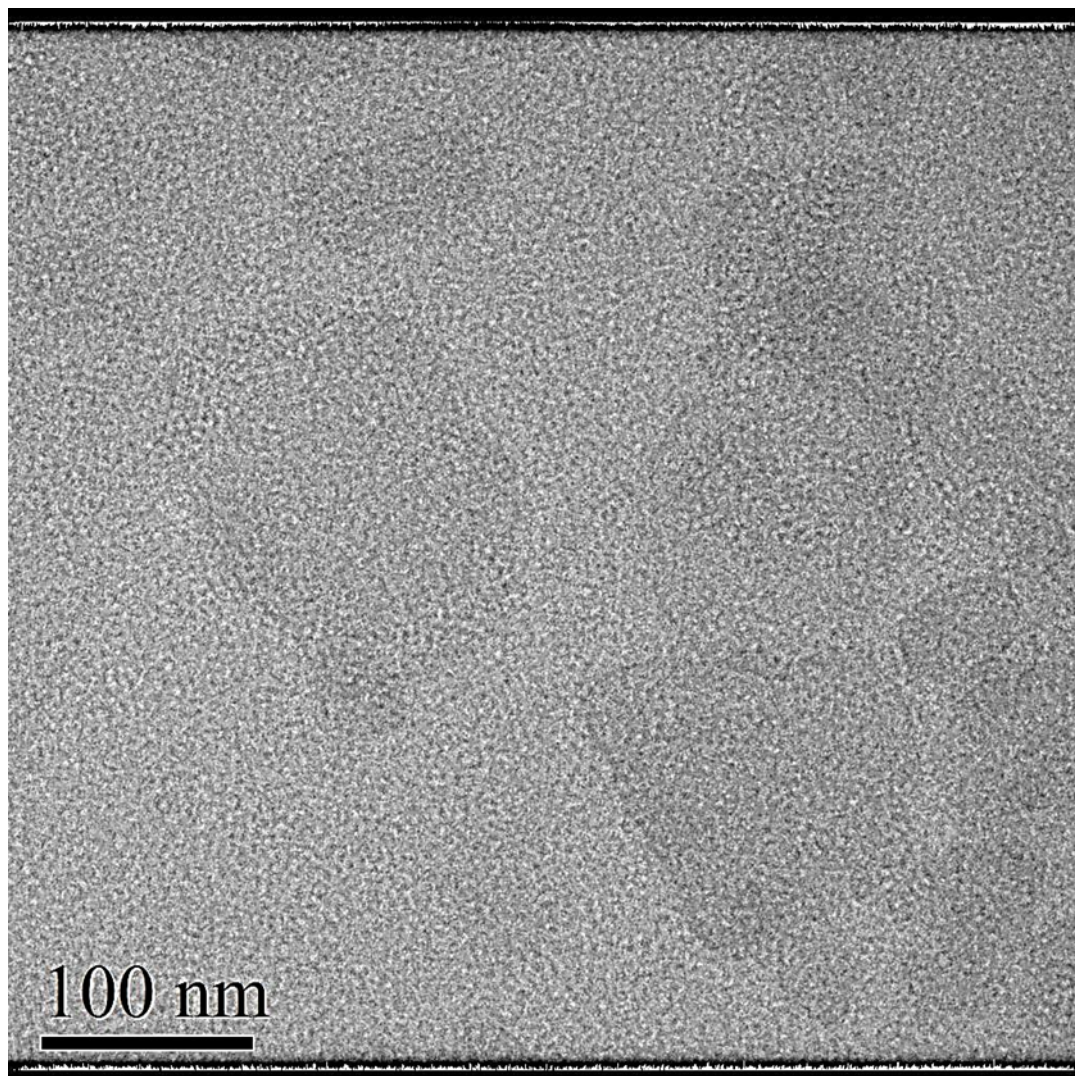

**Figure S2:** TEM image of 0.002 wt% LDH dispersion clearly showing the well-defined exfoliated LDH nanosheets.

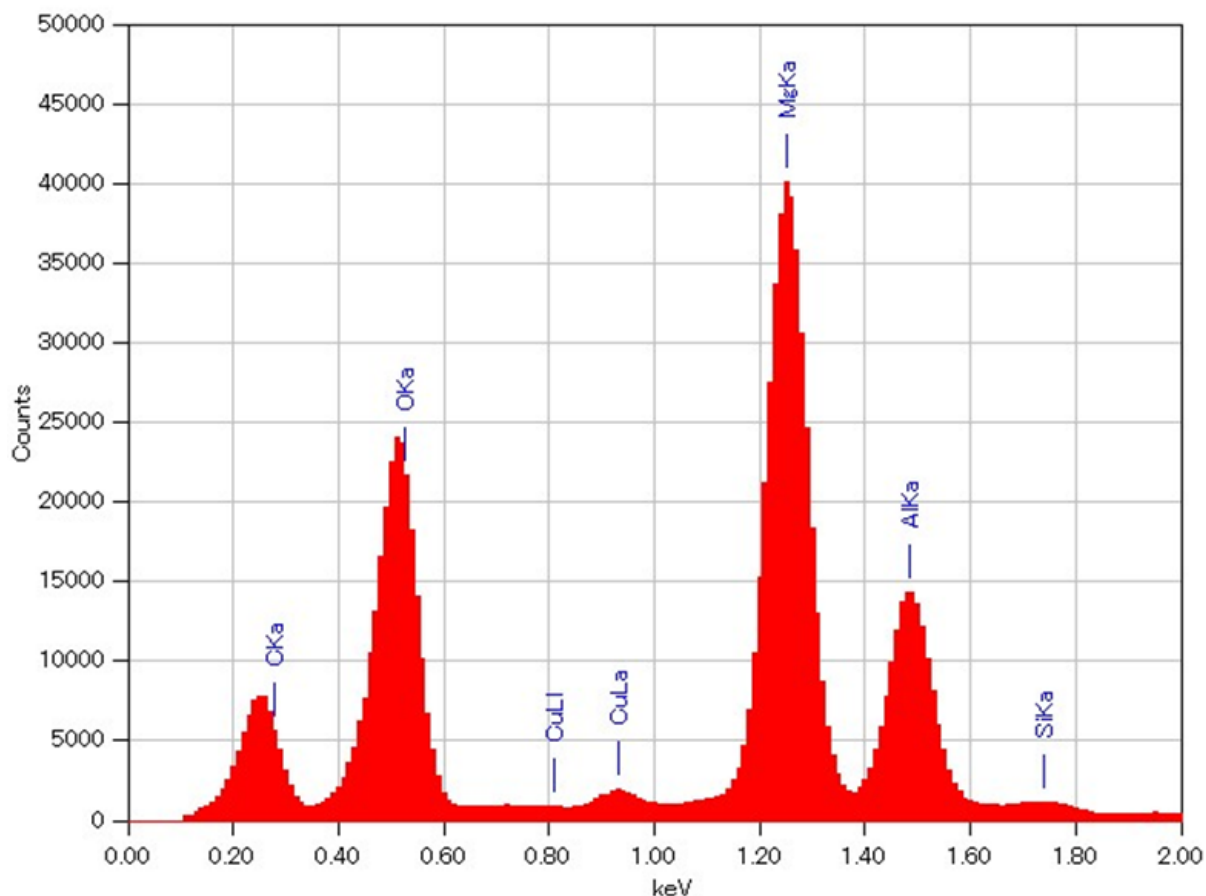

**Figure S3:** EDX mapping confirms the magnesium (Mg) and aluminium (Al) content of the LDH nanosheets.

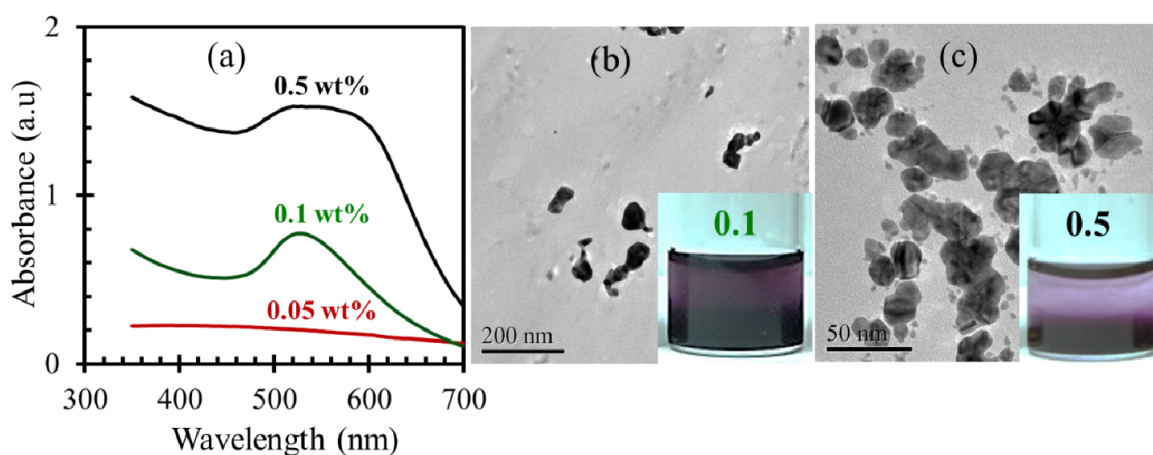

**Figure S4:** (a) UV-visible spectra of AuNPs formed using 20  $\mu\text{L}$  of 5 wt%  $\text{NaAuCl}_4$  in varying concentrations of sodium acrylate (0.1 wt% and 0.5 wt%) acquired after 24 h. Parts (b) and (c) show the corresponding TEM images. Inset shows the digital image of the resultant solution.

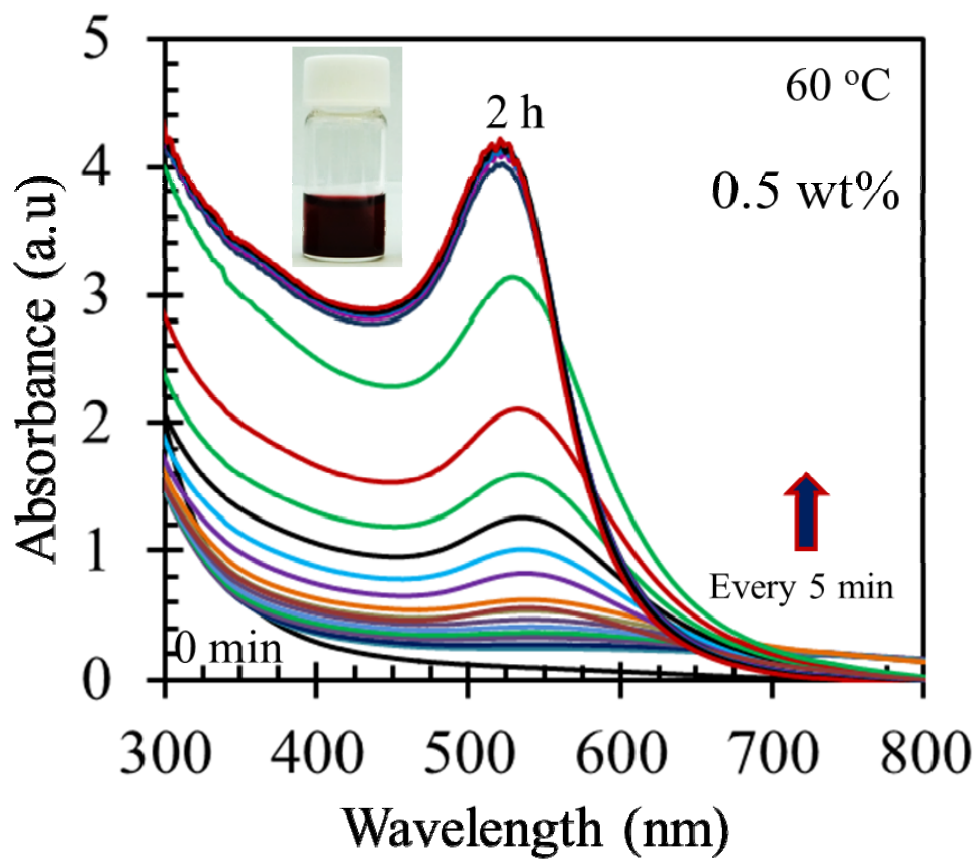

**Figure S5:** UV-visible spectrum for 0.5 wt% LDH at 60 °C. Spectra were acquired at 5 min intervals from the time of preparation. The reaction is almost complete in 2 h.

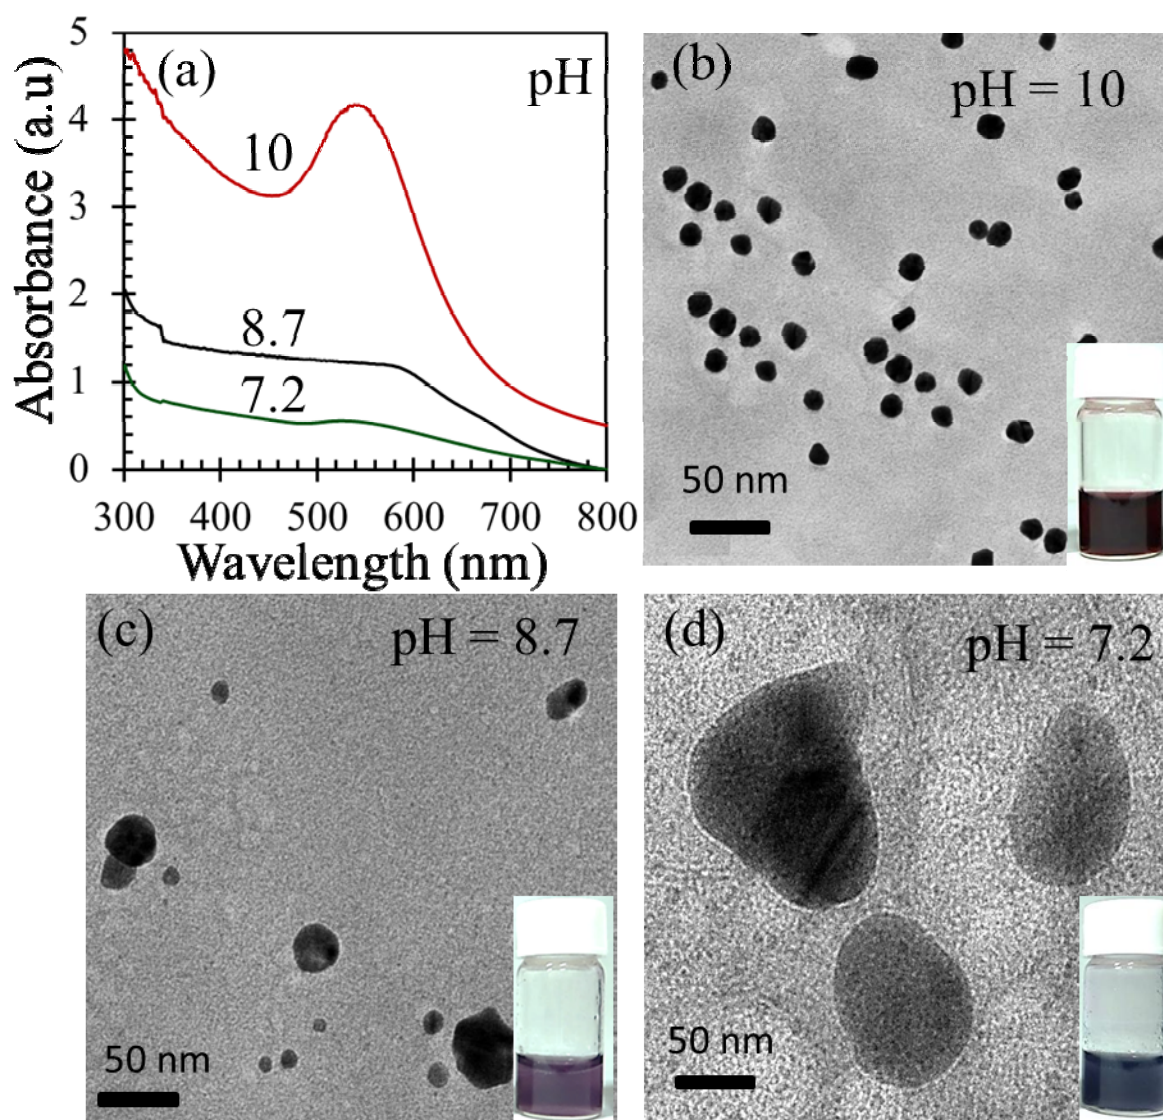

**Figure S6:** (a) UV-visible spectra of AuNPs (using 20  $\mu\text{L}$  of 5 wt%  $\text{NaAuCl}_4$ ) in 0.5 wt% LDH at different pH (adjusted using 1 M HCl). (b, c, d) Corresponding TEM images. Insets show the digital images of the resulting dispersion of AuNPs in LDH.
